# Supplementary material for: Eu(iii)-doped calcium molybdate nano- and microstructures: microfluidic synthesis and morphology tuning via solvent dielectric constant and viscosity control
Source: Royal Society of Chemistry journal article supplement (doi:10.1039/d4ce00549j), 2024-01-01
Supplement: d4ce00549j1.pdf [file d4ce00549j1.pdf]

## SUPPORTING INFORMATION

### Eu(III)-DOPED CALCIUM MOLYBDATE NANO- AND MICROSTRUCTURES: MICROFLUIDIC SYNTHESIS AND MORPHOLOGY TUNING VIA SOLVENT DIELECTRIC CONSTANT AND VISCOSITY CONTROL

Pietro Ostellari<sup>a</sup>, Francesca Tajoli<sup>a</sup>, Ilaria Fortunati<sup>a</sup>, Tommaso Carofiglio<sup>a</sup>, Denis Badocco<sup>a</sup>, Paolo Pastore<sup>a</sup>, Silvia Gross<sup>a, b\*</sup>

a) Department of Chemical Sciences, University of Padova, Via Francesco Marzolo 1, 35131, Padova (Italy)

b) Institute for Chemical Technology and Polymer Chemistry (ITCP) – Karlsruhe Institute of Technology (KIT), Karlsruhe (Germany)

#### Determination of viscosity and dielectric constant of water/ethanol mixtures

Selected equations that allow to express the trend of physico-chemical parameters of binary mixtures of solvents (such as drug solubilization, acid dissociation constant, dielectric constant, viscosity, and surface tension) as a function of their composition and temperature have been reported in the literature. Equation S1 is reported from the work of Jouyban et al.<sup>1</sup>

$$\ln(PCP_{m,T}) = x_1 \cdot \ln(PCP_{1,T}) + x_2 \cdot \ln(PCP_{2,T}) + J_0 \left( \frac{x_1 \cdot x_2}{T} \right) + J_1 \left[ \frac{x_1 \cdot x_2 (x_1 - x_2)}{T} \right] + J_2 \left[ \frac{x_1 \cdot x_2 (x_1 - x_2)^2}{T} \right]$$

**Equation S1.** Jouyban – Acree equation for the determination chemico-physical properties of liquid mixtures as function of temperature and composition.

PCP = physico – chemical property

x = molar ratio ( $x_2 = 1 - x_1$ )

m = mixture

T = temperature (K)

1 e 2 = solvent 1 e solvent 2

$J_i$  = expansion coefficients

#### Determination of the viscosity of water/ethanol mixtures

The viscosity ( $\eta_M$ ) of water/ethanol mixtures used in this paper at 20 and -4 °C (Figure S1) was determined using Equation S1. It was observed that by increasing the wt% of ethanol in water/ethanol mixtures, the viscosity of the mixtures increases until about 50 wt% of ethanol, then it decreases. Moreover, at low temperature (-4 °C) viscosity is doubled.

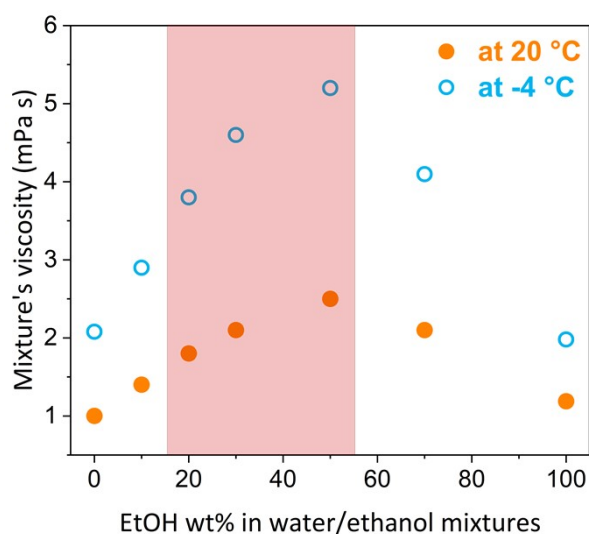

**Figure S1.** Water/ethanol mixtures viscosity as a function of EtOH wt% at 20 °C (orange) and -4 °C (light blue). Red region highlights the range of EtOH wt% employed in this work.

The following viscosity values of water and ethanol were used (Table S1):<sup>2</sup>

| T (°C) | $\eta_w$ (mPa·s) | $\eta_E$ (mPa·s) |
|--------|------------------|------------------|
| 20     | 1.003            | 1.187            |
| -4     | 2.08             | 1.98             |

**Table S1.** Viscosity values for water (w) and ethanol (E) at 20 and -4 °C.

The viscosity value for ethanol at -4 °C was determined by equation  $\eta = A \exp\left(\frac{B}{T + C}\right)$  from the work of Goncalves et al.<sup>3</sup>, by assuming A =  $6.12 \cdot 10^{-4}$  (mPa s), B = 2961 (K), C = 97.3 (K), T = 269 (K). Viscosity value of water at -4 °C was determined by Hallet<sup>4</sup>.

Expansion coefficient determined by Khattab et al<sup>5</sup>, exploiting the Jouyban – Acree equation (Equation S1), were employed, i.e.  $J_0 = 724.652$ ;  $J_1 = 729.357$ ;  $J_2 = 976.050$ .

#### Determination of the dielectric constant of water/ethanol mixtures

The dielectric constant of water/ethanol mixtures ( $\epsilon_M$ ) used in this work at 20 and -4 °C (Figure S2) was also calculated by applying Equation S1. It was observed that the dielectric constant of water/ethanol mixtures continuously

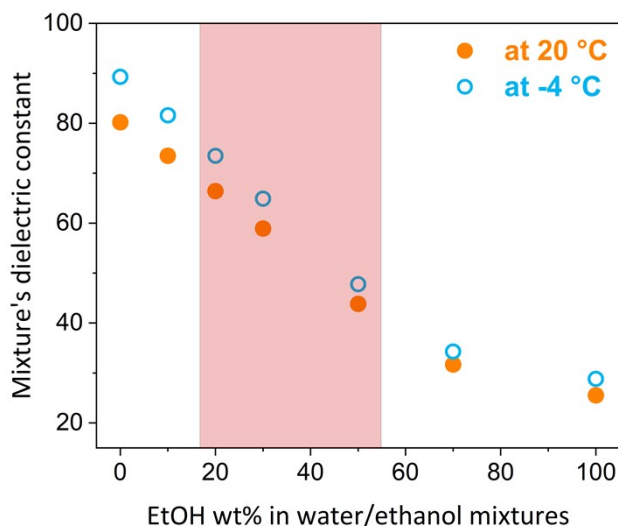

**Figure S2.** Water/ethanol mixtures dielectric constant as a function of EtOH wt% at 20 °C (orange) and -4 °C (light blue). Red region highlights the range of EtOH wt% employed in this work.

decreases by increasing the ethanol content into the mixture. In addition, at -4 °C the dielectric constant of the mixtures was increased of about 10 % with respect to its value at 20 °C.

In Table S2 reference values for the two pure solvents are reported:

| T (°C) | $\epsilon_w$ | $\epsilon_E$ |
|--------|--------------|--------------|
| 20     | 80,2         | 25,5         |
| -4     | 89,3         | 28,8         |

**Table S2.** Dielectric constant values for water (w) and ethanol (E) at 20 and -4 °C.

Dielectric constant values at 20 °C for pure solvent are the one reported into the Handbook of Chemistry and Physics<sup>6</sup>, whereas the values at -4 °C were determined through the equation provided also by the Handbook:  $\epsilon(T) = a + bT + cT^2 + dT^3$ .

Jouyban determined the expansion coefficients  $J$  to be used to calculate the dielectric constant<sup>7</sup>. Since there are lots of parameters which influence the dielectric constant of a liquid, by following the work of Abraham et al<sup>8</sup>, Jouyban inserted the appropriate corrections to Equation S1.

## Particles size distribution: bulk vs flow quenching

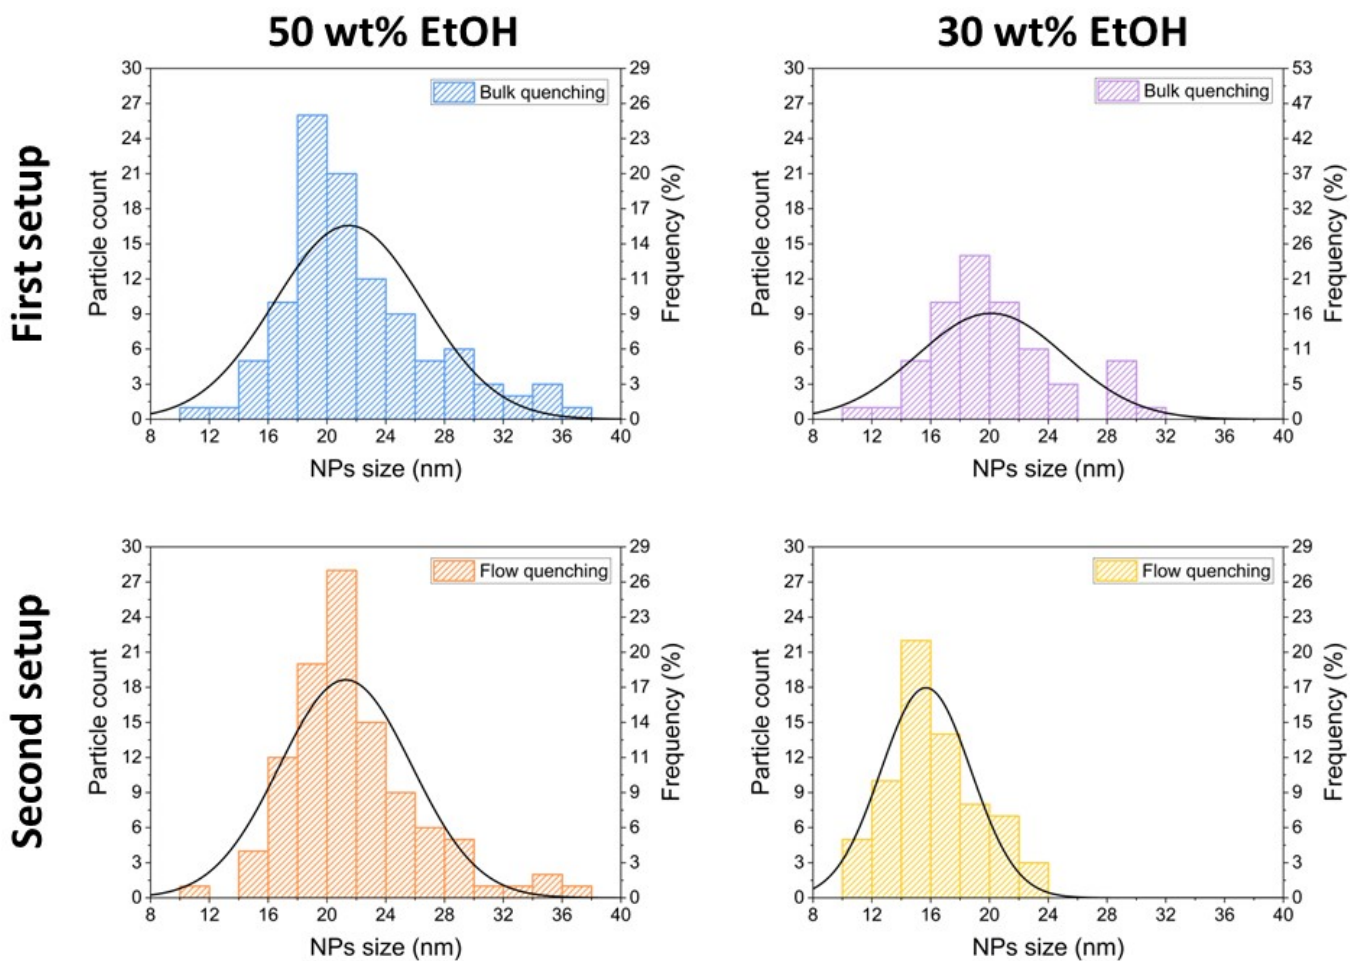

Figure S3. Size distribution of samples prepared at room temperature, with pure ethanol as a quencher. Comparison of bulk vs flow quenching.

## Powder X-ray diffraction patterns of Eu(III)-doped samples

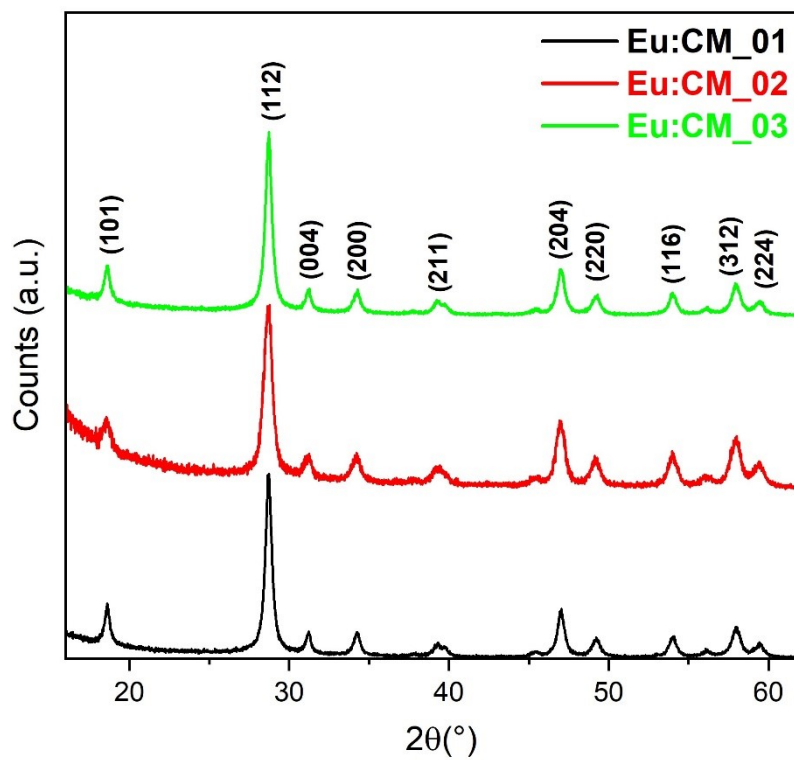

Figure S4. XRD pattern of Eu(III)-doped samples. Miller indexes refers to the *powellite* phase of calcium molybdate.

TEM micrographs of Eu(III)-doped samples

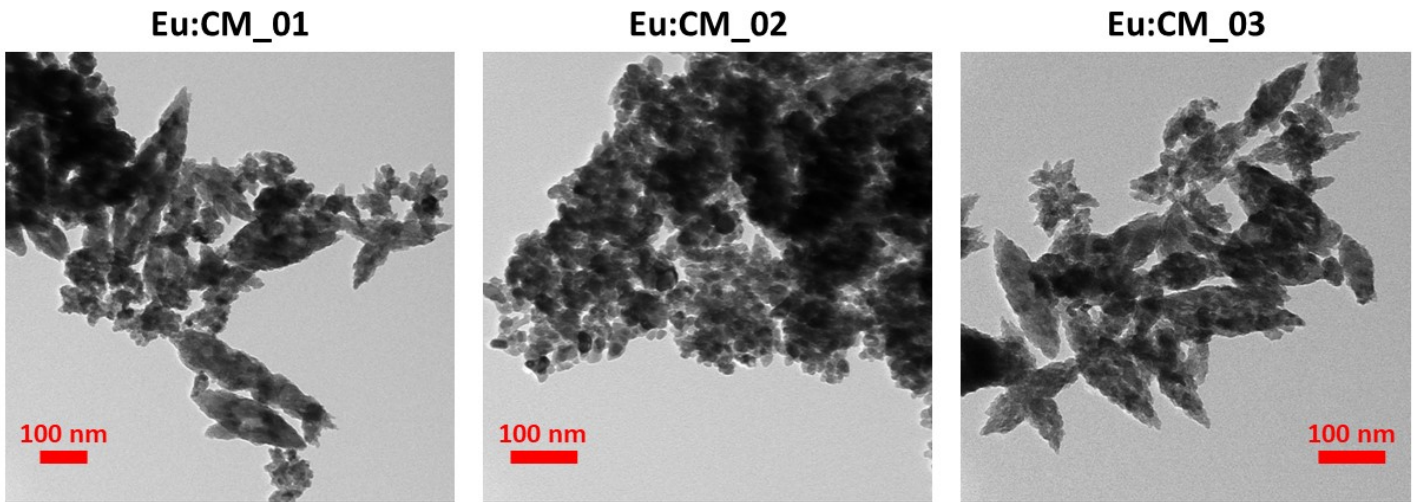

Figure S5. TEM micrographs of Eu(III)-doped samples.

# Photoluminescence decay of Eu(III)-doped samples

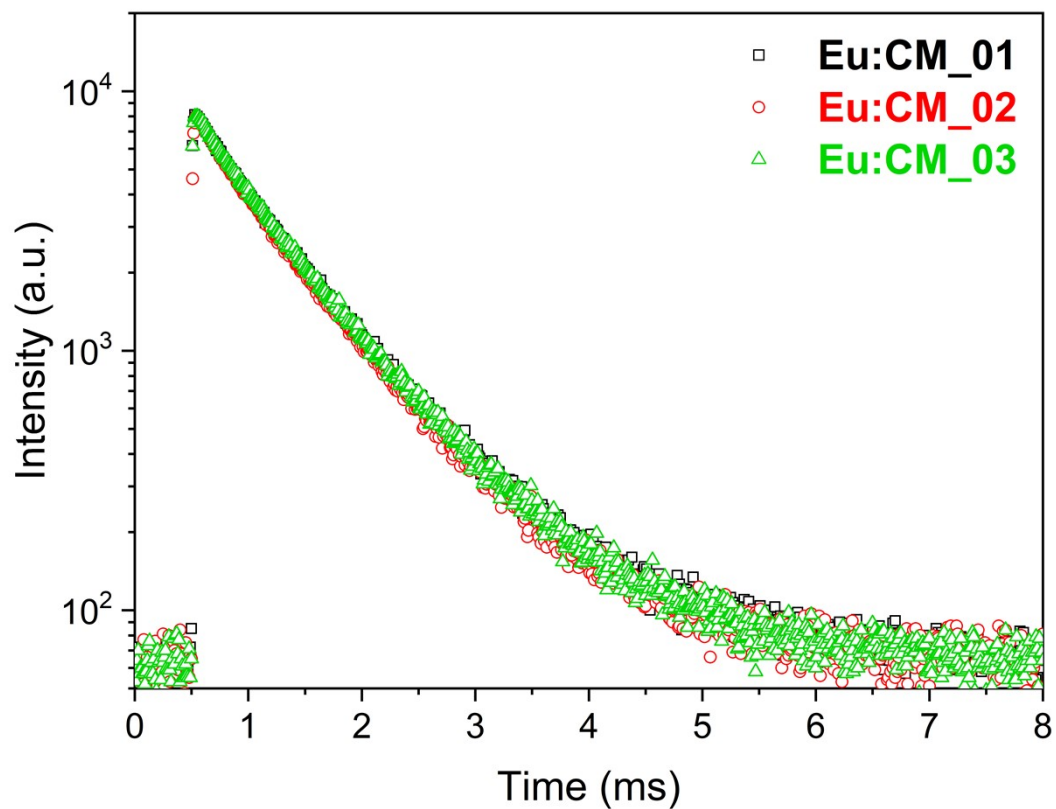

Figure S6. Experimental photoluminescence decay of Eu(III)-doped samples.

20 wt% EtOH

30 wt% EtOH

50 wt% EtOH

EtOH/H<sub>2</sub>O as q.

T<sub>amb</sub>

EtOH as q.

T<sub>amb</sub>

Flow EtOH as q.

T<sub>amb</sub>

EtOH/H<sub>2</sub>O in  
ice as q.

T = -4 °C

EtOH in ice  
as q.

T = -4 °C

Eu(III)-doped  
samples

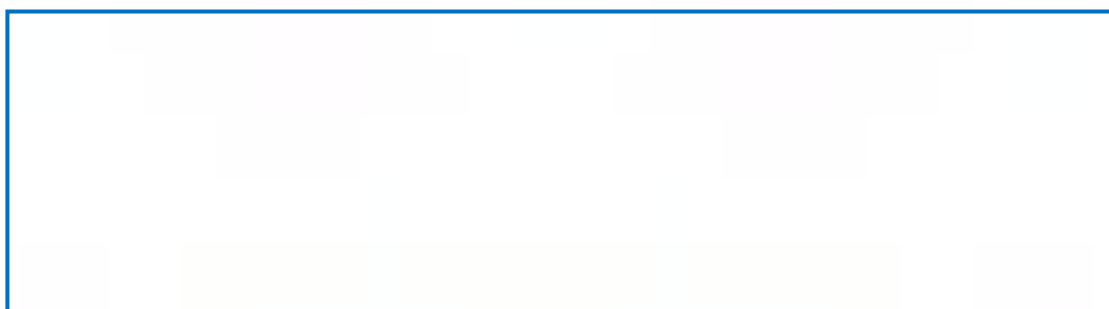

Figure S7. Fitted XRD pattern of the samples reported in the paper



### Lattice parameters of calcium molybdate

As a result of the fitting of XRD patterns of the CM samples with the Pawley method we obtained the lattice parameters:

$$a = 5.23 \text{ \AA}$$

$$c = 11.46 \text{ \AA}$$

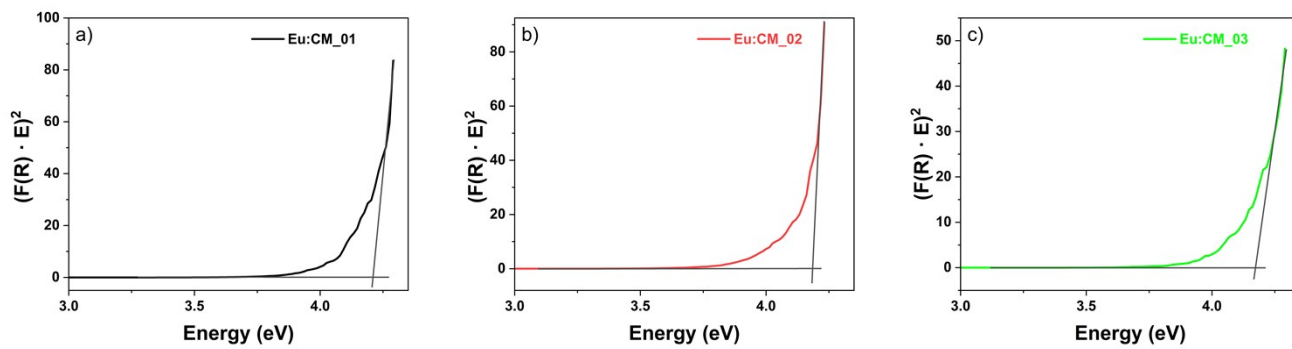

Figure S8. Tauc plots of Eu(III)-doped samples, a) Eu:CM\_01, b) Eu:CM\_02, c) Eu:CM\_03

## References

1. Jouyban, A., Khoubnasabjafari, M., Vaez-Gharamaleki, Z., Fekari, Z., Acree, W. E. , *Chem. Pharm. Bull.*, 2005, **53**, 519–523.
2. González, B., Domínguez, A., Tojo, J. , *J. Chem. Eng. Data*, 2004, **49**, 1590–1596.
3. Gonalves, F. A. M. M., Trindade, A. R., Costa, C. S. M. F., Bernardo, J. C. S., Johnson, I., Fonseca, I. M. A., Ferreira, A. G. M. , *J. Chem. Thermodyn.*, 2010, **42**, 1039–1049.
4. Hallett, J. , *Proc. Phys. Soc.*, 1963, **82**, 1046–1050.
5. Khattab, I. S., Bandarkar, F., Fakhree, M. A. A., Jouyban, A. , *Korean J. Chem. Eng.*, 2012, **29**, 812–817.
6. Haynes, W. M., Lide, D. R., Bruno, T. J. *Handbook of Chemistry and Physics*. 2017, (CRC Press, Boca Raton, 2017).
7. Jouyban, A., Soltanpour, S. , *J. Chem. Eng. Data*, 2010, **55**, 2951–2963.
8. Flanagan, K. B., Hoover, K. R., Garza, O., Hizon, A., Soto, T., Villegas, N., Acree, W. E., Abraham, M. H. , *Phys. Chem. Liq.*, 2006, **44**, 377–386.
